# Supplementary material for: Can We Predict Prostate Cancer Metastasis Based on Biomarkers? Where Are We Now?
Source: MDPI journal article supplement (doi:10.3390/ijms241512508), 2023-08-07
Supplement: s1 [file s1]

**Table S1.** Current commercialized tissue-based genomic tests. Modified from Sotomayor et al. [19].

| Test                | Company                                  | Biomarkers                                                                                                                                                                                                                                                                                                                                                                                                                                                                                                                    | Substrate                                                 | Clinical Endpoints                                                                                                                                                               | Target patient                            | Technique             | Price USD          | Certification                                                                                                                                                                                                                                                                                                                                                    |
|---------------------|------------------------------------------|-------------------------------------------------------------------------------------------------------------------------------------------------------------------------------------------------------------------------------------------------------------------------------------------------------------------------------------------------------------------------------------------------------------------------------------------------------------------------------------------------------------------------------|-----------------------------------------------------------|----------------------------------------------------------------------------------------------------------------------------------------------------------------------------------|-------------------------------------------|-----------------------|--------------------|------------------------------------------------------------------------------------------------------------------------------------------------------------------------------------------------------------------------------------------------------------------------------------------------------------------------------------------------------------------|
| <b>Decipher</b>     | GenomDX (Vancouver, BC Canada)           | 22 coding and noncoding RNAs ( <i>LASP1</i> , <i>IQGAP3</i> , <i>NFIB</i> , <i>S1PR4</i> , <i>THBS2</i> , <i>ANO7</i> , <i>PCDH7</i> , <i>MYBPC1</i> , <i>EPPK1</i> , <i>TSBP</i> , <i>PBX1</i> , <i>NUSAP1</i> , <i>ZWILCH</i> , <i>UBE2C</i> , <i>CAMK2N1</i> , <i>RABGAP1</i> , <i>PCAT-32</i> , <i>GLYATL1P4/P</i> , <i>CAT-80</i> , and <i>TNFRSF19</i> )                                                                                                                                                                | FFPE tissue from prostate tumor biopsies                  | Scores from 0 to 1, classifies patients as high risk<br>0.61 to 1.0 (1 in 5 risk of metastasis), average risk<br>0.46 to 0.6, or low risk 0 to 0.45 (1 in 42 risk of metastasis) | Patients with localized disease on biopsy | RNA Microarray        | \$4,250 - \$5,150. | CLIA-certified. Test is not approved by the FDA. NCCN guidelines state that the test can be considered to be used in patients with localized tumors, but studies to compare effectiveness are necessary to prove clinical utility and improve risk stratification. The test is not cited by the EAU guidelines. Limited Medicare coverage. Available 2015 in USA |
| <b>Prolaris</b>     | Myriad Genetics, Salt Lake City, UT, USA | 31 cell cycle progression (CCP) genes: <i>CDKN3</i> , <i>RRM2</i> , <i>RAD54L</i> , <i>RAD51</i> , <i>CDC20</i> , <i>CDC2</i> , <i>BUB1B</i> , <i>PLK1</i> , <i>TOP2A</i> , <i>PTTG1</i> , <i>FOXM1</i> , <i>KIF11</i> , 1) <i>KIAA0101</i> , <i>NUSAP1</i> , <i>CENPF</i> , <i>ASPM</i> , <i>DLGAP5</i> , <i>BIRC5</i> , <i>KIF20A</i> , <i>TK1</i> , <i>PBK</i> , <i>ASF1B</i> , <i>C18orf24</i> , <i>CDCA3</i> , <i>MCM10</i> , <i>PRC1</i> , <i>DTL</i> , <i>CEP55</i> , <i>CENPM</i> , <i>CDCA8</i> , and <i>ORC6L</i> . | 1) prostate biopsy or a 2) radical prostatectomy specimen | from 0 to 10, with each 1 unit increase reflecting a doubling of risk of disease progression                                                                                     | Patients in Active Surveillance           | mRNA expression level | \$3,400-\$3,900    | Prolaris is validated by the FDA for use in men with NCCN with low risk prostate cancer and for post-prostatectomy patients who are at high risk for prostate cancer recurrence. It has also been incorporated as an option in the NCCN and European Association of Urology guidelines for prostate cancer. Available 2012 in US                                 |
| <b>Onco-type Dx</b> | Genomic Health, Redwood City, CA, USA    | Use 5 reference genes ( <i>ARF</i> , <i>ATP5E</i> , <i>CLTC</i> , <i>GPS1</i> , <i>PGK1</i> ) and 12 genes representing 4 biologic pathways with known                                                                                                                                                                                                                                                                                                                                                                        | paraffin-embedded prostate needle biopsy tissue           | score from 0 to 100, where a value 0 is lowest risk and 100 is highest risk                                                                                                      | Patients in Active Surveillance           | real-time RT-PCR      | \$4,180-\$5,141    | CLIA-certified. \$4180. Covered by Medicare. For other carriers, assistance is available from the manufacturer. Available 2013 in US                                                                                                                                                                                                                             |

roles in PCa tumorigenesis: the androgen pathway (*AZGP1*, *KLK2*, *SRD5A2*, and *FAM13C*), cellular organization (*FLNC*, *GSN*, *TPM2*, and *GSTM2*), stromal response (*BGN*, *COL1A1*, and *SFRP4*) and proliferation (*TPX2*).

**Table S2.** Summary of different Urologic and Oncology Societies guidelines recommendation for the use of TBGB for prediction of metastatic disease.

| Society                                                                                   | Year of last version publication                                                                             | TBGB                                                              |                                                                 |                                                                                                   |
|-------------------------------------------------------------------------------------------|--------------------------------------------------------------------------------------------------------------|-------------------------------------------------------------------|-----------------------------------------------------------------|---------------------------------------------------------------------------------------------------|
|                                                                                           |                                                                                                              | Oncotype Dx                                                       | Prolaris                                                        | Decipher                                                                                          |
| <b>American Urology Association + American Society for Radiation Oncology (AUA/ASTRO)</b> | 2022 Localized PC, 2021 amended in 2023 Advanced PC                                                          | Not routinely recommended                                         | Not routinely recommended                                       | Not routinely recommended                                                                         |
| <b>National Comprehensive Cancer Network (NCCN)</b>                                       | 2023                                                                                                         | Initial risk stratification in low or favorable-intermediate risk | Initial risk stratification in low, intermediate and high risk. | Initial risk stratification in low, intermediate and high risk. Define adjuvant treatment post RP |
| <b>European Guidelines (EAU-EANM-ESTRO-ESUR-SIOG)</b>                                     | 2023                                                                                                         | Not routinely recommended                                         | Not routinely recommended                                       | Describe studies about utility of post-RP but make no recommendation                              |
| <b>American Society of Clinical Oncology (ASCO)</b>                                       | 2018 Localized PC, 2020 Molecular biomarkers in localized PC, 2023 Non-castrated advanced, recurrent and mPC | Not specifically mentioned                                        | Not specifically mentioned                                      | Not routinely recommended                                                                         |
